# Supplementary material for: A pair of transposon-derived proteins function in a histone acetyltransferase complex for active DNA demethylation
Source: PubMed Central journal article supplement — Cell Res. 2016 Dec 9;27(2):226–40. doi: 10.1038/cr.2016.147 (PMC5339849; doi:10.1038/cr.2016.147), 2016-12-09
Supplement: cr2016147x2.pdf [file cr2016147x2.pdf]

## Supplemental information, Figure S2

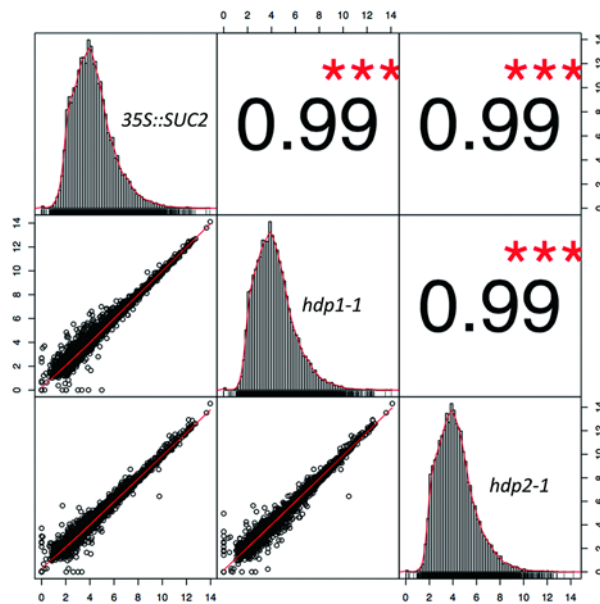

**Figure S2** Pearson's coefficient plots for RNA-Seq of *35S::SUC2*, *hdp1-1* and *hdp2-1*.

Related to **Figure 2**. The asterisks indicate the significance levels of the correlations.

\*\*\* $P$ -value < 0.001. The labels of  $x$  axis and  $y$  axis are  $\log_2$  transformation of the FPKM plus one.
