# Supplementary material for: A pair of transposon-derived proteins function in a histone acetyltransferase complex for active DNA demethylation
Source: PubMed Central journal article supplement — Cell Res. 2016 Dec 9;27(2):226–40. doi: 10.1038/cr.2016.147 (PMC5339849; doi:10.1038/cr.2016.147), 2016-12-09
Supplement: cr2016147x5.pdf [file cr2016147x5.pdf]

## Supplemental information, Figure S5

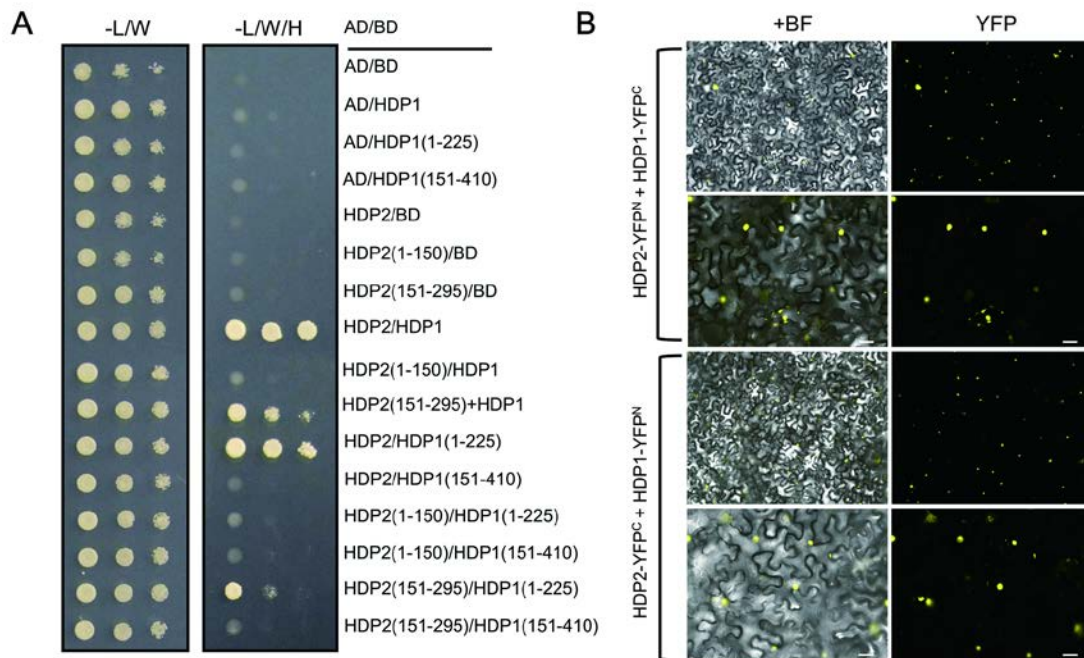

**Figure S5** The domain requirement of HDP1 and HDP2 interaction. Related to **Figure 5**. **(A)** The N terminus of HDP1 directly interacts with the C-terminus of HDP2 in the yeast two-hybrid assay. The full-length and truncated forms of HDP1 and HDP2 were cloned into AD and BD vectors. Yeast cells harboring different combinations were grown on selection SD(-L/W) and SD(-L/W/H) media. **(B)** Bimolecular fluorescence complementation (BiFC) assay showing that HDP1 and HDP2 interact in the nucleus. Full-length HDP1 and HDP2 were fused with split YFP. BiFC assay was performed in tobacco (*N. benthamiana*) leaves. YFP fluorescence was examined at 2-day post infiltration. BF, bright field.
