# Supplementary material for: A pair of transposon-derived proteins function in a histone acetyltransferase complex for active DNA demethylation
Source: PubMed Central journal article supplement — Cell Res. 2016 Dec 9;27(2):226–40. doi: 10.1038/cr.2016.147 (PMC5339849; doi:10.1038/cr.2016.147), 2016-12-09
Supplement: cr2016147x6.pdf [file cr2016147x6.pdf]

## Supplemental information, Figure S6

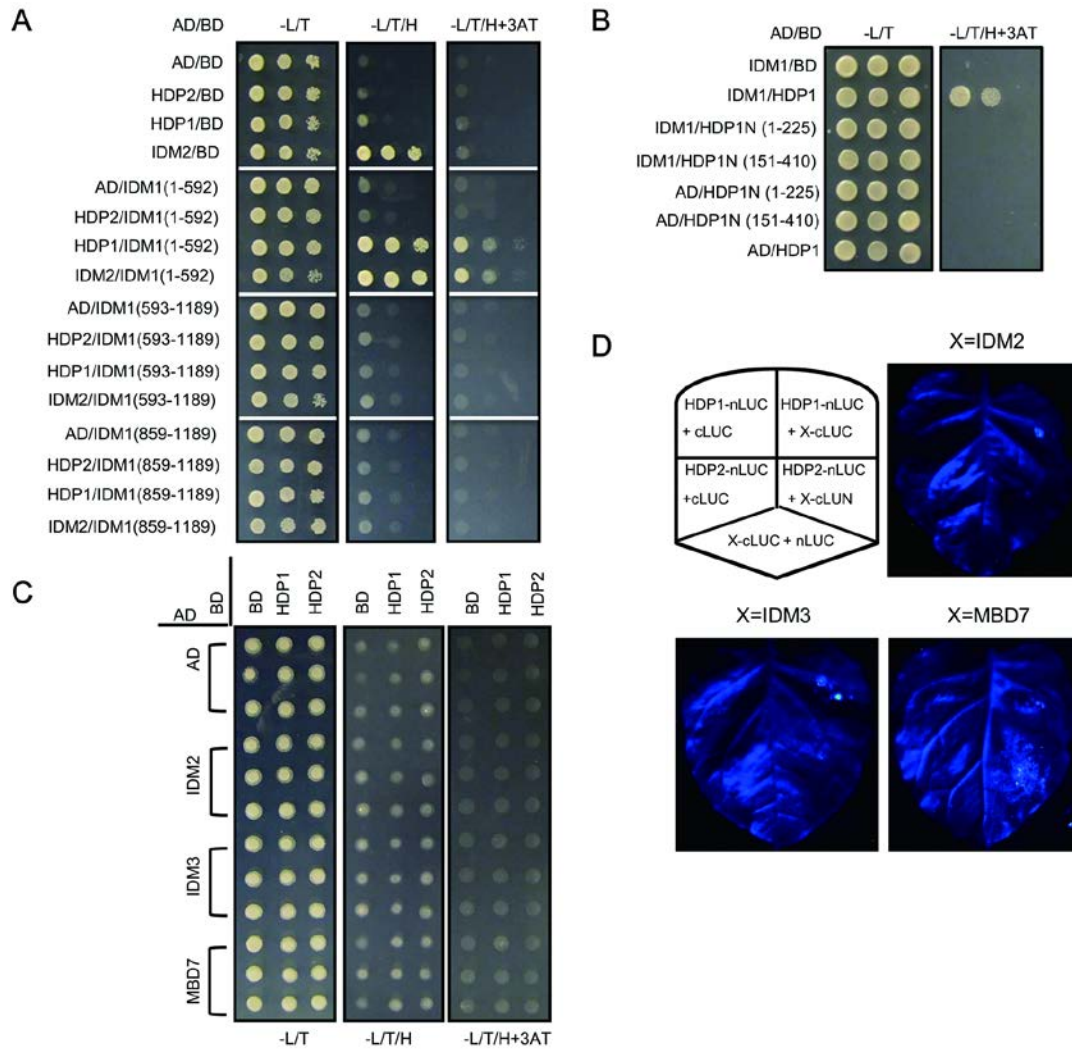

**Figure S6** The N-terminal domain of IDM1 is responsible for its interaction with HDP1 but not HDP2. Related to **Figure 6**. **(A)** The domain requirement for IDM1 interacting with HDP1 in Y2H assay. The N-terminal 1-592 amino acids, the C-terminal 593-1189 and 859-1189 amino acids of IDM1 were fused with BD. The full-length HDP1, HDP2 and IDM2 were fused with AD. Yeast cells transformed with N-terminal IDM1 and HDP1 or IDM2 can grow on SD-L/T/H/3AT medium. Empty AD and BD vectors served as negative control. **(B)** Full-length HDP1 is required for

its interaction with IDM1. The domain requirement for HDP1 interacting with IDM1 was tested in Y2H assay. (C) HDP1 and HDP2 do not interact with IDM2, IDM3 and MBD7 in Y2H assay. No combinations between HDP1, HDP2 and IDM2, IDM3, MBD7 can grow on SD-L/T/H and SD-L/T/H/3AT media. (D) HDP1 and HDP2 do not interact with IDM2, IDM3 and MBD7 in split luciferase assay. The split luciferase assay was performed in tobacco leaves to verify the interaction between HDP1, HDP2 and IDM2, IDM3 and MBD7. The left panel indicates the position of different combination on tobacco leaf. Luciferase activity was examined at 2 days after infiltration. X represents IDM2, IDM3 and MBD7 in different combinations, respectively.
